# Supplementary material for: Molecular Responses of the Eukaryotic Cell Line INT407 on the Internalized Campylobacter jejuni—The Other Side of the Coin
Source: MDPI journal article supplement (doi:10.3390/pathogens13050386), 2024-05-07
Supplement: s1 [file s1]

### Supplementary Table S2

Selected candidate gene primer characteristics. Six genes were selected randomly from the higher-, middle- and lower hits for RT-PCR validation.

| Gene    | Forward                | Reverse                | Fold Change | <i>p</i> -Value |
|---------|------------------------|------------------------|-------------|-----------------|
| FNDC1   | TCATCTTGGGATGCGCTACCA  | GGCAGAAGTAGTGTCTCCAGGA | 7.58175     | 0.45148         |
| ISL2    | AGAGACGGGAAGACCTACTGCA | AGCACTCGATGTGGTACACGCT | 5.05449     | 0.29145         |
| GAPDH   | GTCTCCTCTGACTTCAACAGCG | ACCACCCTGTTGCTGTAGCCAA | 1           | 1               |
| VMO1    | GCTTTAATAGCGGAGGTGGGA  | TTGGCTCCTTTTCTGTTCTGT  | 1           | 0.043363        |
| MYOM1   | TGTCAAGGCTGTCAGTGAGGAG | GAAGCATTCGCTTACTGCGGAG | -3.16549    | 0.54961         |
| TMEM86A | CTCATCTGGCAGGACCAAGGAT | CATCACCAGACCTGTCCGAAGA | -6.33099    | 0.31581         |
